# Supplementary figures and images for: Neuronal precursor cell proliferation in the hippocampus after transient cerebral ischemia: a comparative study of two rat strains using stereological tools
Source: Springer Nature journal article supplement (doi:10.1186/2040-7378-2-8), 2010-04-06

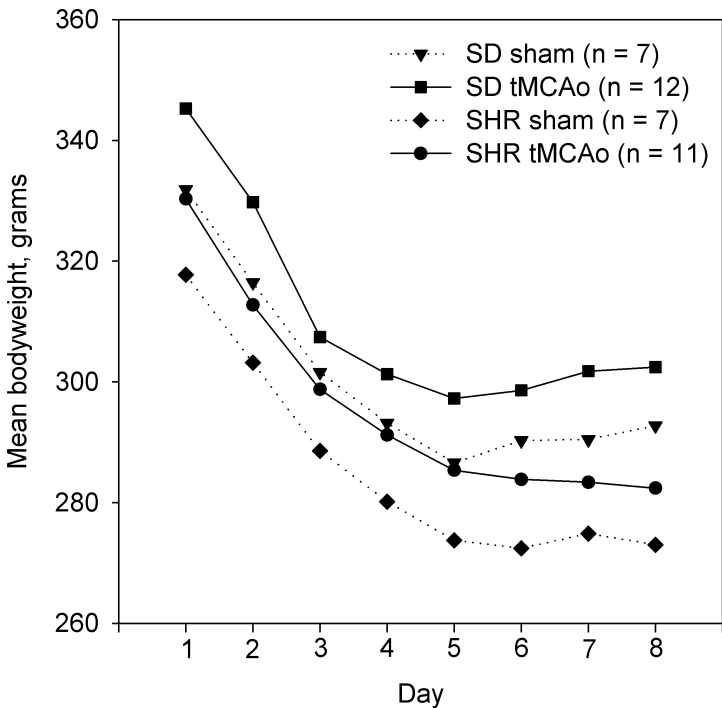

Supplement: Additional file 3 [file 2040-7378-2-8-s3.pdf]
